# Supplementary material for: Uncoupled biological and chronological aging of neutrophils in cancer promotes tumor progression
Source: J Immunother Cancer. 2021 Dec 7;9(12):e003495. doi: 10.1136/jitc-2021-003495 (PMC8655594; doi:10.1136/jitc-2021-003495)
Supplement: Supplementary data [file jitc-2021-003495supp002.xlsx]

## Sheet: Tabelle1
Figure	groups	n	test	P value	normality (P value)	Equal variance (P value)	comment
1a	no statistics
1b (BALB/c, CXCL2)	3	4	Kruskal-Wallis One Way Analysis of Variance of Ranks	0.002 (significant)	<0.05 (failed)	-
1b (BALB/c, tumor)	3	4	Kruskal-Wallis One Way Analysis of Variance of Ranks	0.001 (significant)	0.413 (passed)	<0.05 (failed)
1b (C3H, CXCL2)	3	4	Kruskal-Wallis One Way Analysis of Variance of Ranks	0.001 (significant)	<0.05 (failed)	-
1b (C3H, tumor)	3	4	One way ANOVA	0.001 (significant)	0.097 (passed)	0.283 (passed)
1c	no statistics
1d (BALB/c, blood, tumor free)	2	5	Mann-Whitney Rank Sum Test	0.008 (significant)	0.159 (passed)	0.050 (failed)
1d (BALB/c, blood, 4T1)	2	5	t test	0.182 (not significant)	0.207 (passed)	1.000 (passed)
1d (BALB/c, tumor, 4T1)	2	6	t test	0.143 (not significant)	0.997 (passed)	0.764 (passed)
1d (C3H, blood, tumor free)	2	6	t test	0.008 (significant)	0.240 (passed)	0.310 (passed)
1d (C3H, blood, SCC VII)	2	6	t test	0.479 (not significant)	0.379 (passed)	0.683 (passed)
1d (C3H, tumor, SCC VII)	2	3	t test	0.399 (not significant)	0.667 (passed)	1.000 (passed)
2a (SCC VII)	3	3-4	One way ANOVA	<0.001 (significant)	0.353 (passed)	0.256 (passed)
2a (4T1)	3	3-6	One way ANOVA	0.003 (significant)	0.072 (passed)	0.183 (passed)
2b (SCC VII, aged)	2	8	t test	0.488 (not significant)	0.166 (passed)	0.060 (passed)
2b (SCC VII, non aged)	2	8	Mann-Whitney Rank Sum Test	0.229 (not significant)	<0.050 (failed)	-
2b (4T1, aged)	2	3	Mann-Whitney Rank Sum Test	0.036 (significant)	<0.050 (failed)	-
2b (4T1, non aged)	2	3	Mann-Whitney Rank Sum Test	0.036 (significant)	<0.050 (failed)	-
2c (SCCVII)	2	6-7	t test	0.0394 (significant)	0.949 (passed)	0.762 (passed)
2c (4T1)	2	6-7	t test	0.0112 (significant)	0.579 (passed)	0.241 (passed)
2d	no statistics
2e (SCC VII)	2	7	Mann-Whitney Rank Sum Test	<0.001 (significant)	0.069 (passed)	<0.050 (failed)
2e (4T1)	2	3	t test	<0.001 (significant)	0.548 (passed)	1.000 (passed)
3a (HMGB1)	3	4-5	Kruskal-Wallis One Way Analysis of Variance of Ranks	0.017 ( significant)	<0.050 (failed)	-
3a (uric acid)	3	5	Kruskal-Wallis One Way Analysis of Variance of Ranks	<0.001 (significant)	<0.050 (failed)	-
3b (TLR2)	4	3	Kruskal-Wallis One Way Analysis of Variance of Ranks	<0.001 (significant)	0.484 (passed)	<0.050 (failed)
3b (TLR4)	4	3	Kruskal-Wallis One Way Analysis of Variance of Ranks	<0.001 (significant)	0.310 (passed)	<0.050 (failed)
3c	2	5	t test	0.027 (significant)	0.141 (passed)	1.000 (passed)
3d (neutrophils)	5	4-8	Kruskal-Wallis One Way Analysis of Variance of Ranks	<0.001 (significant)	0.113 (passed)	<0.050 (failed)
3d (cMOs)	5	4-8	Kruskal-Wallis One Way Analysis of Variance of Ranks	0.008(significant)	<0.050 (failed)	-
3d (ncMOs)	5	4-8	One way ANOVA	0.024 (significant)	0.072 (passed)	0.209 (passed)	post hoc test not significant
3d (aged vs non-aged)	2	5	t test	<0.001 (significant)	0.963 (passed)	0.894 (passed)
3e	no statistics
3f (SCC VII rolling flux D3)	3	5-6	One way ANOVA	0.045 (significant)	0.123 (passed)	0.936 (passed)
3f (SCC VII rolling flux D7)	3	5-6	Kruskal-Wallis One Way Analysis of Variance of Ranks	0.173 (not significant)	<0.050 (failed)	-
3f (SCC VII adherence D3)	3	5-6	Kruskal-Wallis One Way Analysis of Variance of Ranks	0.426 (not significant)	0.098 (passed)	<0.050 (failed)
3f (SCC VII adherence D7)	3	5-6	Kruskal-Wallis One Way Analysis of Variance of Ranks	0.047 (significant)	0.116 (passed)	<0.050 (failed)
3f (4T1 rolling flux D3)	3	4	One way ANOVA	0.432 (not significant)	0.586 (passed)	0.259 (passed)
3f (4T1 rolling flux D7)	3	4	One way ANOVA	0.175 (not significant)	0.720 (passed)	0.111 (passed)
3f (4T1 adherence D3)	3	4	One way ANOVA	0.285 (not significant)	0.218 (passed)	0.658 (passed)
3f (4T1 adherence D7)	3	4	One way ANOVA	0.016 (significant)	0.557 (passed)	0.118 (passed)
4a (ICAM-1)	2	3	t test	0.0485 (significant)	0.423 (passed)	0.108 (passed)
4a (VCAM-1)	2	3	t test	0.589 (not significant)	0.569 (passed)	0.665 (passed)
4b (rolling 3h)	2	3	t test	0.972 (not significant)	0.390 (passed)	0.508 (passed)
4b (rolling 6h)	2	4-5	t test	0.860 (not significant)	0.754 (passed)	0.758 (passed)
4b (adherence 3h)	2	3	t test	0.283 (not significant)	0.294 (passed)	0.483 (passed)
4b (adherence 6h)	2	4-5	t test	<0.001 (significant)	0.699 (passed)	0.891 (passed)
4c (IL-2)	2	5	t test	0.002 (significant)	0.437 (passed)	0.335 (passed)
4c (IFNƴ)	2	5	t test	0.022 (significant)	0.544 (passed)	0.140 (passed)
4c (CXCL2)	2	5	t test	0.007 (significant)	0.769 (passed)	0.113 (passed)
4c (CCL3)	2	5	t test	0.012 (significant)	0.803 (passed)	0.176 (passed)
4d (ICAM-1)	3	3-5	Kruskal-Wallis One Way of Variance on Ranks	0.007 (significant)	<0.050 (failed)	-
4d (VCAM-1)	3	3-5	One way ANOVA	<0.001 (significant)	0.052 (passed)	<0.050 (failed)
4d (E-Selectin)	3	3-5	Kruskal-Wallis One Way of Variance on Ranks	0.008 (significant)	<0.050 (failed)	-
4d (P-Selectin)	3	3-5	Kruskal-Wallis One Way of Variance on Ranks	0.009 (significant)	<0.050 (failed)	-
4e (CD11b aged)	3	3-5	One way ANOVA	0.019 (significant)	0.813 (passed)	0.515 (passed)
4e (CD11b non-aged)	3	3-5	One way ANOVA	0.019 (significant)	0.914 (passed)	0.425 (passed)
4e (CD11a aged)	3	3	One way ANOVA	0.596 (not significant)	0.998 (passed)	0.257 (passed)
4e (CD11a non-aged)	3	3	One way ANOVA	0.251 (not significant)	0.980 (passed)	0.087 (passed)
4e (CD49d aged)	3	3	One way ANOVA	0.140 (not significant)	0.464 (passed)	0.166 (passed)
4e (CD49d non-aged)	3	3	One way ANOVA	0.058 (not significant)	0.265 (passed)	0.803 (passed)
4f (aged)	3	3-5	One way ANOVA	0.022 (significant)	0.960 (passed)	0.310 (passed)
4f (non-aged)	3	3-5	Kruskal-Wallis One Way of Variance on Ranks	0.238 (not significant)	<0.050 (failed)	-
5a (SCC VII tumor weight)	2	6-11	Mann-Whitney Rank Sum Test	0.014 (significant)	<0.050 (failed)	-
5a (SCC VII neutrophils tumor)	2	6-9	Mann-Whitney Rank Sum Test	0.02 (significant)	<0.050 (failed)	-
5a (SCC VII neutrophils blood)	2	8-14	Mann-Whitney Rank Sum Test	<0.001 (significant)	0.178 (passed)	<0.050 (failed)
5a (4T1 tumor weight)	2	3-5	t test	0.001 (significant)	0.439 (passed)	0.369 (passed)
5a (4T1 neutrophils tumor)	2	3-5	Mann-Whitney Rank Sum Test	0.036 (significant)	<0.050 (failed)	-
5a (4T1 neutrophils blood)	2	4-5	Mann-Whitney Rank Sum Test	0.016 (significant)	<0.050 (failed)	-
5b (SCC VII, aged, NLRP3 inhibitor)	2	4-5	Mann-Whitney Rank Sum Test	0.016 (significant)	<0.050 (failed)	-
5b (SCC VII, non-aged, NLRP3 inhibitor)	2	4-5	Mann-Whitney Rank Sum Test	0.016 (significant)	<0.050 (failed)	-
5b (SCC VII, aged, chemokine inhibitors)	3	3-4	Kruskal-Wallis One Way of Variance on Ranks	0.690 (not significant)	<0.050 (failed)	-
5b (SCC VII, non-aged, chemokine inhibitors)	3	3-4	One way ANOVA	0.425 (not significant)	0.810 (passed)	0.273 (passed)
5b (4T1, aged, NLRP3 inhibitor)	2	3	t test	0.004 (significant)	0.609 (passed)	0.202 (passed)
5b (4T1, non-aged, NLRP3 inhibitor)	2	3	t test	<0.001 (significant)	0.681 (passed)	0.330 (passed)
5b (4T1, aged, chemokine inhibitors)	3	3-5	One way ANOVA	0.121 (not significant)	0.825 (passed)	0.238 (passed)
5b (4T1, non-aged, chemokine inhibitors)	3	3-5	One way ANOVA	0.683 (not significant)	0.401 (passed)	0.418 (passed)
5c (SCC VII)	4	4	One way ANOVA	<0.001 (significant)	0.197 (passed)	0.915 (passed)
5c (4T1)	4	4-5	Kruskal-Wallis One Way of Variance on Ranks	0.002 (significant)	0.792 (passed)	<0.050 (failed)
5d (SCC VII, inflammasome)	3	4	One way ANOVA	0.834 (not significant)	0.128 (passed)	0.994 (passed)
5d (SCC VII, chemokine inhibitors)	3	10	One way ANOVA	0.023 (significant)	0.064 (passed)	0.102 (passed)	post hoc test not significant
5d (4T1, inflammasome)	3	3	One way ANOVA	0.746 (not significant)	0.145 (passed)	0.937 (passed)
5d (4T1, chemokine inhibitors)	3	10	One way ANOVA	0.024 (significant)	0.216 (passed)	0.582 (passed)	post hoc test not significant
6a	no statistics
6b (SCC VII)	3	5-10	One way ANOVA	<0.001 (significant)	0.749 (passed)	0.483 (passed)
6b (4T1)	3	4-7	One way ANOVA	<0.001 (significant)	0.109 (passed)	<0.050 (failed)
6c (C3H)	2	5	t test	0.894 (not significant)	0.536 (passed)	0.121 (passed)
6c (Balb/c)	2	5	t test	0.445 (not significant)	0.738 (passed)	0.271 (passed)
6d (C3H)	2	5-6	t test	0.333 (not significant)	0.175 (passed)	0.239 (passed)
6d (Balb/c)	2	6	t test	0.311 (not significant)	0.098 (passed)	0.698 (passed)
6e (SCC VII, branches)	2	4-5	t test	0.958 (not significant)	0.165 (passed)	0.598 (passed)
6e (SCC VII, junctions)	2	4-5	t test	0.891 (not significant)	0.104 (passed)	0.520 (passed)
6e (SCC VII, vessel density)	2	4-5	t test	0.419 (not significant)	0.524 (passed)	0.576 (passed)
6e (4T1, branches)	2	4	t test	0.440 (not significant)	0.518 (passed)	0.460 (passed)
6e (4T1, junctions)	2	4	t test	0.433 (not significant)	0.515 (passed)	0.411 (passed)
6e (4T1, vessel density)	2	4	t test	0.772 (not significant)	0.789 (passed)	0.236 (passed)
6f (SCC VII, CD4)	2	3-4	t test	0.645 (not significant)	0.082 (passed)	0.867 (passed)
6f (SCC VII, CD8)	2	3-4	Mann-Whitney Rank Sum Test	1.000 (not significant)	<0.050 (failed)	-
6f (4T1, CD4)	2	3-5	t test	0.228 (not significant)	0.127 (passed)	0.732 (passed)
6f (4T1, CD8)	2	3-5	t test	0.642 (not significant)	0.526 (passed)	0.874 (passed)
S1	statistical data in figure
S2 BALB/c (L-selectin, blood, tumor free)	2	6	t test	0.012 (significant)	0.085 (passed)	0.703 (passed)
S2 BALB/c (L-selectin, blood, 4T1))	2	3	t test	0.384 (not significant)	0.659 (passed)	0.929 (passed)
S2 BALB/c (L-selectin, tumor, 4T1))	2	6	t test	0.130 (not significant)	0.261 (passed)	0.514 (passed)
S2 BALB/c (CXCR2, blood, tumor free)	2	6	t test	0.002 (significant)	0.881 (passed)	0.903 (passed)
S2 BALB/c (CXCR2, blood, 4T1))	2	3	t test	0.236 (not significant)	0.295 (passed)	0.583 (passed)
S2 BALB/c (CXCR2, tumor, 4T1))	2	3	t test	0.081 (not significant)	0.104 (passed)	0.920 (passed)
S2 C3H (L-selectin, blood, tumor free)	2	6	Mann-Whitney Rank Sum Test	0.002 (significant)	<0.050 (failed)	-
S2 C3H (L-selectin, blood, SCC VII))	2	6	Mann-Whitney Rank Sum Test	0.400 (not significant)	<0.050 (failed)	-
S2 C3H (L-selectin, tumor, SCC VII))	2	3	t test	0.633 (not significant)	0.478 (passed)	0.765 (passed)
S2 C3H (CXCR2, blood, tumor free)	2	6	t test	<0.001(significant)	0.387 (passed)	0.851 (passed)
S2 C3H (CXCR2, blood, SCC VII))	2	4	t test	0.589 (not significant)	0.874 (passed)	0.871 (passed)
S2 C3H (CXCR2, tumor, SCC VII))	2	4	t test	0.885 (not significant)	0.598 (passed)	0.448 (passed)
S3 4T1 (L-selectin)	2	3	t test	<0.001 (significant)	0.240 (passed)	0.602 (passed)
S3 4T1 (CXCR2)	2	3	t test	0.018 (significant)	0.974 (passed)	0.110 (passed)
S3 SCC VII (L-selectin)	2	3-5	t test	0.050 (significant)	0.386 (passed)	0.431 (passed)
S3 SCC VII (CXCR2)	2	3	t test	0.009 (significant)	0.421 (passed)	0.519 (passed)
S4 FSC (SCC VII, blood)	2	3	t test	0.217 (not significant)	0.728 (passed)	0.300 (passed)
S4 FSC (SCC VII, tumor)	2	3	t test	0.178 (not significant)	0.504 (passed)	0.622 (passed)
S4 FSC (4T1, blood)	2	3	t test	0.071 (not significant)	0.954 (passed)	0.231 (passed)
S4 FSC (4T1, tumor)	2	3	t test	0.116 (not significant)	0.394 (passed)	0.538 (passed)
S5	no statistics
S6a (neutrophils)	4	5-7	One way ANOVA	0.003 (significant)	0.484 (passed)	0.701 (passed)
S6a (cMOs)	4	6-7	One way ANOVA	0.001 (significant)	0.589 (passed)	0.093 (passed)
S6a (ncMOs)	4	5-6	One way ANOVA	0.285 (not significant)	0.050 (passed)	0.589 (passed)
S6b (SCC VII)	2	6-9	t test	0.976 (not significant)	0.328 (passed)	0.260 (passed)
S6b (4T1)	2	3-5	t test	0.0431 (significant)	0.731 (passed)	0.297 (passed)
S7a (C3H, blood, tumor-free)	2	3	Mann-Whitney Rank Sum Test	0.400 (not significant)	<0.050 (failed)	-
S7a (C3H, blood, SCC VII)	2	3	t test	0.080 (not significant)	0.960 (passed)	0.224 (passed)
S7a (BALB/c, blood, tumor-bearing)	2	3	t test	0.382 (not significant)	0.085 (passed)	0.422 (passed)
S7a (BALB/c, blood, 4T1)	2	3	t test	0.066 (not significant)	0.205 (passed)	0.711 (passed)
S7a (C3H, tumor, SCC VII)	2	3	t test	0.026 (significant)	0.906 (passed)	0.308 (passed)
S7a (BALB/c, tumor, 4T1)	2	3	t test	0.008 (significant)	0.169 (passed)	0.730 (passed)
S7b (SCC VII)	2	3	t test	0.478 (not significant)	0.347 (passed)	0.685 (passed)
S7b (4T1)	2	3	t test	0.947 (not significant)	0.574 (passed)	0.596 (passed)
S8 SCC VII (blood, CD4)	2	4	t test	0.744 (not significant)	0.874 (passed)	0.084 (passed)
S8 SCC VII (blood, CD8)	2	4	Mann-Whitney Rank Sum Test	0.200 (not significant)	<0.050 (failed)	-
S8 SCC VII (tumor, CD4)	2	4	t test	0.977 (not significant)	0.671 (passed)	0.788 (passed)
S8 SCC VII (tumor, CD8)	2	4	t test	0.601 (not significant)	0.891 (passed)	0.825 (passed)
S8 4T1 (blood, CD4)	2	4	t test	0.104 (not significant)	0.392 (passed)	0.348 (passed)
S8 4T1 (blood, CD8)	2	4	t test	0.697 (not significant)	0.944 (passed)	0.147 (passed)
S8 4T1 (tumor, CD4)	2	3	t test	0.079 (not significant)	0.690 (passed)	0.092 (passed)
S8 4T1 (tumor, CD8)	2	3-4	Mann-Whitney Rank Sum Test	0.629 (not significant)	0.503 (passed)	<0.050 (failed)
